# Supplementary material
Source: PubMed Central journal article supplement (PMC5355499)
Supplement: mmc1.pdf [file mmc1.pdf]

**Biophysical Journal, Volume 112**

**Supplemental Information**

**Modeling the Actin.myosin ATPase Cross-Bridge Cycle for Skeletal and  
Cardiac Muscle Myosin Isoforms**

**Srboljub M. Mijailovich, Djordje Nedic, Marina Svcevic, Boban Stojanovic, Jonathan Walklate, Zoltan Ujfalusi, and Michael A. Geeves**

SUPPORTING MATERIAL

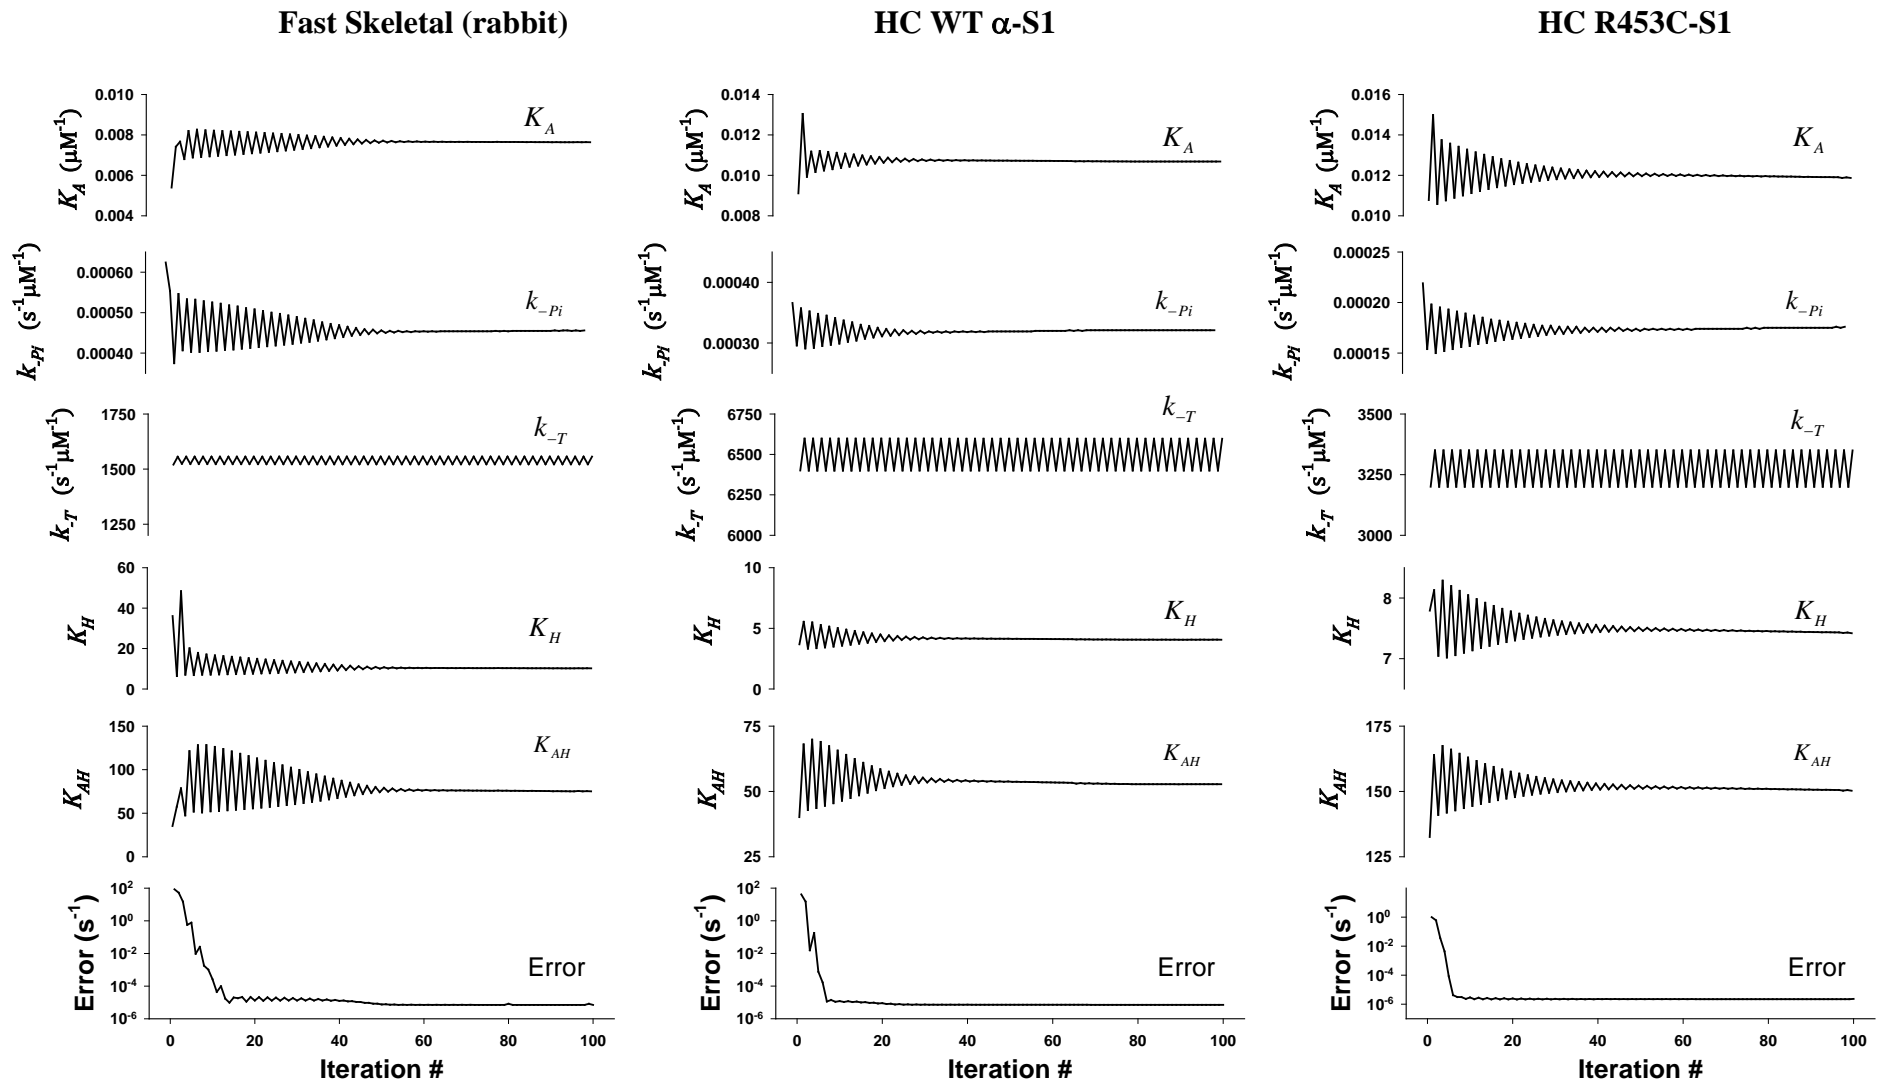

FIGURE S1 Convergence of fitted parameters for rabbit fast skeletal, human cardiac  $\alpha$ -S1 and human cardiac  $\beta$ -R453C-S1

**TABLE S1 Rate and equilibrium constants for the 3 myosin isoforms and one  $\beta$ -cardiac myosin mutant. At both 100 and 25 mM KCl**

|                         | Units                                 | Fast Skeletal      |            | HC WT $\beta$      |            | HC WT* $\alpha$ | HC WT $\alpha$ | $\beta$ -R453C* | $\beta$ -R453C |
|-------------------------|---------------------------------------|--------------------|------------|--------------------|------------|-----------------|----------------|-----------------|----------------|
|                         |                                       | 25 mM KCl          | 100 mM KCl | 25 mM KCl          | 100 mM KCl | 25 mM KCl       | 100 mM KCl     | 25 mM KCl       | 100 mM KCl     |
| $K_A$                   | mM <sup>-1</sup>                      | 7.08               | 2.0        | 10.7               | 4.0        | ?               | 11.30          | ?               | 14.35          |
| $K_{Pi}$                | mM                                    | 100                | ?          | 100                | ?          | ?               | 100            | ?               | 100            |
| $K_{D^*}$               | —                                     | 50                 | 50         | 0.1667             | 0.14       | 50              | 83.33          | 0.05            | 0.046          |
| $K_D$                   | $\mu$ M                               | 100                | 120        | 36                 | 170        | 197             | 152            | 33              | 100.00         |
| $K_T$                   | mM <sup>-1</sup>                      | 5                  | 1.92       | 3                  | 0.88       | 4.1             | 1.6            | 3.2             | 1.1            |
| $K_{T^*}$               | —                                     | 1507               | 1250       | 154.30             | 144        | 150.00          | 150.00         | 150             | 124.80         |
| $K_{T^{**}}$            | $\mu$ M                               | 1000               | 1000       | 1000               | 1000       | 1000            | 1000           | 1000            | 1000           |
| $K_H$                   | —                                     | 5                  | 5.5        | 8.91               | 5.6        | 5               | 8.52           | 1.8             | 2.86           |
| $K_{AH}$                | —                                     | 61.77              | ?          | 63.14              | ?          | 63.3            | 99.60          | ?               | 124.43         |
| $K_m$                   | $\mu$ M                               | 101.0 <sup>†</sup> | -          | 39.55 <sup>†</sup> | -          | 67.8            | ?              | 28 <sup>†</sup> | ?              |
| $V_{max}$               | s <sup>-1</sup>                       | 29.3 <sup>†</sup>  | -          | 5.94 <sup>†</sup>  | -          | 18              | ?              | 5 <sup>†</sup>  | ?              |
| Forward Rate Constants  |                                       |                    |            |                    |            |                 |                |                 |                |
| $k_A$                   | $\mu$ M <sup>-1</sup> s <sup>-1</sup> | 3.54               | 1          | 10.75              | 4          | ?               | 11.30          | ?               | 14.35          |
| $k_{Pi}$                | s <sup>-1</sup>                       | 49.67              | ?          | 15.95              | ?          | ?               | 27.20          | ?               | 14.69          |
| $k_{D^*}$               | s <sup>-1</sup>                       | 300                | 300        | 59.00              | 93         | 100             | 100.00         | 39.69           | 63.00          |
| $k_D$                   | s <sup>-1</sup>                       | 1000               | 1200       | 1000               | 1000       | 1970            | 1520           | 1000            | 1000           |
| $k_T$                   | $\mu$ M <sup>-1</sup> s <sup>-1</sup> | 7.7                | 10         | 10.00              | 3.33       | 27.2            | 10.51          | 10              | 3.3            |
| $k_{T^*}$               | s <sup>-1</sup>                       | 1507               | 1250       | 1543               | 1445       | 1800            | 1500           | 1500            | 1248           |
| $k_{T^{**}}$            | s <sup>-1</sup>                       | 1000               | 1000       | 1000               | 1000       | 1000            | 1000           | 1000            | 1000           |
| $k_H$                   | s <sup>-1</sup>                       | 70                 | 110        | 12.47              | 14         | 95.1            | 143.16         | 2.52            | 4              |
| $k_{AH}$                | s <sup>-1</sup>                       | 123.54             | ?          | 12.63              | ?          | ?               | 149.40         | ?               | 8.71           |
| Backward Rate Constants |                                       |                    |            |                    |            |                 |                |                 |                |
| $k_{-A}$                | s <sup>-1</sup>                       | 500                | 500        | 1000               | 1000       | ?               | 1000           | ?               | 1000           |
| $k_{-Pi}$               | mM <sup>-1</sup> s <sup>-1</sup>      | 0.5                | 0.5        | 0.15               | ?          | ?               | 0.27           | ?               | 0.15           |
| $k_{-D^*}$              | s <sup>-1</sup>                       | 6                  | 6          | 354                | 650        | ?               | 1.20           | 794             | 1369           |
| $k_{-D}$                | $\mu$ M <sup>-1</sup> s <sup>-1</sup> | 10                 | 10         | 27.8               | 5.9        | 10              | 10             | 30.3            | 10             |
| $k_{-T}$                | s <sup>-1</sup>                       | 1540               | 5208       | 3349               | 3784       | 6500            | 6541.53        | 3125            | 3000           |
| $k_{-T^*}$              | s <sup>-1</sup>                       | 1                  | 1          | 10                 | 10         | 12              | 10             | 10              | 10.00          |
| $k_{-T^{**}}$           | $\mu$ M <sup>-1</sup> s <sup>-1</sup> | 1                  | 1          | 1                  | 1          | 1               | 1              | 1               | 1              |
| $k_{-H}$                | s <sup>-1</sup>                       | 14                 | 20         | 1.4                | 2.5        | 19              | 16.8           | 1.4             | 1              |
| $k_{-AH}$               | s <sup>-1</sup>                       | 2                  | ?          | 0.2                | ?          | ?               | 1.5            | ?               | 0.07           |

For the ATPase assays

[ATP] = 5mM, [ADP] = [Pi] = 0 mM (standard initial rate ATPase conditions).

[S1] = 1  $\mu$ M with varied [actin].

Conditions: 25 mM KCl, 20 mM MOPS, 5 mM MgCl<sub>2</sub> unless otherwise stated.

## Source of Data

**Bold** allowed to vary in the fit to ATPase data

 Assumed diffusion limited:

 Assumed min/max value

 From detailed balance  $K_i = k_i/k_{-i}$

 From transients

 from ATPase data reference:

NB the data for HC  $\alpha$  WT and R453C at 25 mM KCl is estimated from the 100 mM data and the KCl dependence of the values for the rabbit fast and HC- $\beta$  muscle isoforms.

1: Swenson, A.M., Trivedi, D.V., Rauscher, A.A., Wang, Y., Takagi, Y., Palmer, B.M., Málnási-Csizmadia, A., Debold, E.P., Yengo, C. M. Magnesium modulates actin binding and ADP release in myosin motors. *The Journal of Biological Chemistry*, 2014, 289 (34) pp 23977-91.

Iia from rabbit

2: Nyitrai, M., Rossi, R., Adamek, N., Pellegrino, M.A., Bottinelli, R., Geeves, M. A. What limits the velocity of fast-skeletal muscle contraction in mammals? *Journal of Molecular Biology*, 2006, 355 (3) 432-42

This work gives values of  $k_2$  ( $= 740 \text{ s}^{-1}$ ) and  $1/K_T$  ( $= 520 \text{ }\mu\text{M}$ ) at 12 C. The value of  $1/K_T$  is independent of temperature so the value of  $k_2$  at 20 C can be estimated from the  $K_T k_2$  value at 20 C. Thus  $K_T k_2 = 2.4 \text{ }\mu\text{M}^{-1} \text{ s}^{-1}$  where  $K_T = 0.00192 \text{ }\mu\text{M}$  and  $k_2 = 1,248 \text{ s}^{-1}$ .

3: Nag, S., Sommese, R.F., Ujfalusi, Z., Combs, A., Langer, S., Sutton, S., Leinwand, L. A., Geeves, M. A., Ruppel, K. M., Spudich, J. A. Contractility parameters of human  $\beta$ -cardiac myosin with the hypertrophic cardiomyopathy mutation R403Q show loss of motor function. *Sci Adv.* 2015 Oct 9;1(9):e1500511. doi: 10.1126/sciadv.1500511

4: Sommese R.F., Sung J., Nag S., Sutton S. Deacon J.C. Choe E., Leinwand L.A., Ruppel K., Spudich J.A. Molecular consequences of the R453C hypertrophic cardiomyopathy mutation on human  $\beta$ -cardiac myosin motor function. *Proc Natl Acad Sci U S A.* 2013 Jul 30;110(31):12607-12. doi: 10.1073/pnas.1309493110

**Table S2 State occupancies of intermediates in the crossbridge cycle for the four myosins used here as a function of actin concentration and load.**

|                        | A-MDPi | AMD    | AM-D   | AM     | AMT    | A-MT   | MT     | MDPi   | ATPase<br>(s <sup>-1</sup> ) | Detach. | Weak<br>Att | Strong<br>Att | Duty<br>ratio | Δ% AMD<br>with load | Velocity<br>(μm/s) |
|------------------------|--------|--------|--------|--------|--------|--------|--------|--------|------------------------------|---------|-------------|---------------|---------------|---------------------|--------------------|
| <b>Fast Skeletal</b>   |        |        |        |        |        |        |        |        |                              |         |             |               |               |                     |                    |
| [A]= Km = 101 μM       | 0.3234 | 0.0494 | 0.0147 | 0.0008 | 0.0098 | 0.0244 | 0.1260 | 0.4515 | 14.7353                      | 0.5775  | 0.3478      | 0.0747        | 0.0747        |                     | 0.9862             |
| [A]= 3Km               | 0.4848 | 0.0741 | 0.0221 | 0.0012 | 0.0147 | 0.0534 | 0.1269 | 0.2229 | 22.0896                      | 0.3498  | 0.5382      | 0.1120        | 0.1120        |                     | 0.9860             |
| [A]= 20Km              | 0.6152 | 0.0940 | 0.0280 | 0.0015 | 0.0187 | 0.1377 | 0.0639 | 0.0410 | 28.0331                      | 0.1049  | 0.7529      | 0.1422        | 0.1422        |                     | 0.9857             |
| [A]= 3Km - loaded      | 0.5611 | 0.0857 | 0.0085 | 0.0004 | 0.0057 | 0.0255 | 0.0649 | 0.2481 | 8.5232                       | 0.3130  | 0.5866      | 0.1004        | 0.1004        | 15.75               | 0.4245             |
| <b>HC WT β - S1</b>    |        |        |        |        |        |        |        |        |                              |         |             |               |               |                     |                    |
| [A]= Km = 39.55 μM     | 0.1865 | 0.0683 | 0.0030 | 0.0002 | 0.0020 | 0.0138 | 0.2779 | 0.4484 | 2.9744                       | 0.7263  | 0.2002      | 0.0734        | 0.0734        |                     | 0.2023             |
| [A]=3Km                | 0.2797 | 0.1024 | 0.0045 | 0.0003 | 0.0032 | 0.0444 | 0.3423 | 0.2232 | 4.4614                       | 0.5655  | 0.3241      | 0.1103        | 0.1103        |                     | 0.2021             |
| [A]=20Km               | 0.3550 | 0.1299 | 0.0057 | 0.0004 | 0.0050 | 0.2056 | 0.2562 | 0.0422 | 5.6619                       | 0.2984  | 0.5606      | 0.1410        | 0.1410        |                     | 0.2008             |
| [A]=3Km - loaded       | 0.3707 | 0.1357 | 0.0020 | 0.0001 | 0.0014 | 0.0224 | 0.1744 | 0.2933 | 1.9720                       | 0.4677  | 0.3930      | 0.1393        | 0.1393        | 32.52               | 0.0708             |
| <b>HC WT α - S1</b>    |        |        |        |        |        |        |        |        |                              |         |             |               |               |                     |                    |
| [A]= Km = 67.8 μM      | 0.2801 | 0.0901 | 0.0046 | 0.0003 | 0.0051 | 0.0212 | 0.1988 | 0.3997 | 9.0033                       | 0.5985  | 0.3013      | 0.1001        | 0.1001        |                     | 0.4497             |
| [A]=3Km                | 0.4201 | 0.1352 | 0.0069 | 0.0005 | 0.0078 | 0.0475 | 0.1833 | 0.1987 | 13.5034                      | 0.3820  | 0.4676      | 0.1504        | 0.1504        |                     | 0.4489             |
| [A]=20Km               | 0.5333 | 0.1716 | 0.0087 | 0.0006 | 0.0105 | 0.1399 | 0.0982 | 0.0373 | 17.1395                      | 0.1355  | 0.6732      | 0.1914        | 0.1914        |                     | 0.4477             |
| [A]=3Km - loaded       | 0.4829 | 0.1554 | 0.0026 | 0.0002 | 0.0030 | 0.0253 | 0.1058 | 0.2247 | 5.1737                       | 0.3305  | 0.5082      | 0.1612        | 0.1612        | 14.94               | 0.1605             |
| <b>HC R453C β - S1</b> |        |        |        |        |        |        |        |        |                              |         |             |               |               |                     |                    |
| [A]= Km = 28 μM        | 0.1423 | 0.1130 | 0.0025 | 0.0002 | 0.0017 | 0.0105 | 0.2904 | 0.4394 | 2.5013                       | 0.7298  | 0.1528      | 0.1174        | 0.1174        |                     | 0.1065             |
| [A]=3Km                | 0.2134 | 0.1696 | 0.0038 | 0.0002 | 0.0027 | 0.0334 | 0.3584 | 0.2185 | 3.7525                       | 0.5769  | 0.2468      | 0.1763        | 0.1763        |                     | 0.1064             |
| [A]=20Km               | 0.2707 | 0.2151 | 0.0048 | 0.0004 | 0.0043 | 0.1682 | 0.2953 | 0.0412 | 4.7601                       | 0.3365  | 0.4389      | 0.2246        | 0.2246        |                     | 0.1060             |
| [A]=3Km - loaded       | 0.2835 | 0.2253 | 0.0017 | 0.0001 | 0.0012 | 0.0168 | 0.1837 | 0.2877 | 1.6619                       | 0.4714  | 0.3003      | 0.2283        | 0.2283        | 32.84               | 0.0364             |

**TABLE S3: Resolution matrices for Fast Skeletal (Rabbit), HC WT  $\alpha$ -S1 and HC R 452C  $\beta$ -S1**

| HF-Sk S1  |              |                                       | $K_A$          | $k_{Pi}$       | $k_{-T}$                              | $K_H$          | $K_{AH}$       |
|-----------|--------------|---------------------------------------|----------------|----------------|---------------------------------------|----------------|----------------|
| $K_A$     | <b>0.008</b> | –                                     | <b>0.98105</b> | 0.02946        | -0.00102                              | -0.09029       | -0.09531       |
| $k_{-Pi}$ | <b>0.452</b> | mM <sup>-1</sup> s <sup>-1</sup>      | 0.02946        | <b>0.95335</b> | 0.00107                               | 0.14446        | 0.15064        |
| $k_{-T}$  | <b>1557</b>  | s <sup>-1</sup> $\mu$ M <sup>-1</sup> | -0.00102       | 0.00107        | <b>2.5<math>\times 10^{-6}</math></b> | 0.00024        | 0.00030        |
| $K_H$     | <b>10.22</b> | $\mu$ M <sup>-1</sup>                 | -0.09029       | 0.14446        | 0.00024                               | <b>0.84917</b> | -0.46562       |
| $K_{AH}$  | <b>75.15</b> | $\mu$ M <sup>-1</sup>                 | -0.09531       | 0.15064        | 0.00030                               | -0.46562       | <b>0.81309</b> |

| HC WT- $\alpha$ S1 |              |                                       | $K_A$          | $k_{Pi}$       | $k_{-T}$                              | $K_H$          | $K_{AH}$       |
|--------------------|--------------|---------------------------------------|----------------|----------------|---------------------------------------|----------------|----------------|
| $K_A$              | <b>0.011</b> | –                                     | <b>0.99340</b> | 0.01164        | -0.00051                              | -0.04754       | -0.05355       |
| $k_{-Pi}$          | <b>0.321</b> | mM <sup>-1</sup> s <sup>-1</sup>      | 0.01164        | <b>0.99653</b> | -0.00018                              | 0.01166        | 0.00802        |
| $k_{-T}$           | <b>6597</b>  | s <sup>-1</sup> $\mu$ M <sup>-1</sup> | -0.00051       | -0.00018       | <b>2.3<math>\times 10^{-6}</math></b> | 0.00097        | 0.00103        |
| $K_H$              | <b>4.061</b> | $\mu$ M <sup>-1</sup>                 | -0.04754       | 0.01166        | 0.00097                               | <b>0.95986</b> | -0.02654       |
| $K_{AH}$           | <b>52.76</b> | $\mu$ M <sup>-1</sup>                 | -0.05355       | 0.00802        | 0.00103                               | -0.02654       | <b>0.98087</b> |

| HC R452C- $\beta$ S1 |              |                                       | $K_A$          | $k_{Pi}$       | $k_{-T}$                               | $K_H$          | $K_{AH}$       |
|----------------------|--------------|---------------------------------------|----------------|----------------|----------------------------------------|----------------|----------------|
| $K_A$                | <b>0.012</b> | –                                     | <b>0.96580</b> | 0.35804        | -0.00010                               | -0.21072       | -0.21505       |
| $k_{-Pi}$            | <b>0.176</b> | mM <sup>-1</sup> s <sup>-1</sup>      | 0.35804        | <b>0.90917</b> | 0.00009                                | 0.23395        | 0.23350        |
| $k_{-T}$             | <b>3349</b>  | s <sup>-1</sup> $\mu$ M <sup>-1</sup> | -0.00010       | 0.00009        | <b>0.15<math>\times 10^{-6}</math></b> | 0.00014        | 0.00015        |
| $K_H$                | <b>7.419</b> | $\mu$ M <sup>-1</sup>                 | -0.21072       | 0.23395        | 0.00014                                | <b>0.85566</b> | -0.13811       |
| $K_{AH}$             | <b>150.3</b> | $\mu$ M <sup>-1</sup>                 | -0.21505       | 0.23350        | 0.00015                                | -0.13811       | <b>0.85850</b> |

**TABLE S4: Sensitivity analysis of the fitted parameters to change of +20% or -20% fixed parameters  $k_{-D}$ ,  $K_{D^*}$ ,  $k_{D^*}$  and  $K_{-T^*}$  for HC WT  $\beta$  - S1.**

|                         | Units                           | Estimated constants | Fixed $k_{-D}$  |                 | Fixed $K_{D^*}$ |                 | Fixed $k_{-D^*}$ |                  | Fixed $K_{-T^*}$ |                  | Fixed $k_{-T^{**}}$ |                     |
|-------------------------|---------------------------------|---------------------|-----------------|-----------------|-----------------|-----------------|------------------|------------------|------------------|------------------|---------------------|---------------------|
|                         |                                 |                     | $K_{D^*} +20\%$ | $K_{D^*} -20\%$ | $k_{D^*} +20\%$ | $k_{D^*} -20\%$ | $k_{-D^*} +20\%$ | $k_{-D^*} -20\%$ | $K_{-T^*} +20\%$ | $K_{-T^*} -20\%$ | $K_{-T^{**}} +20\%$ | $K_{-T^{**}} -20\%$ |
| $K_A$                   | $\mu\text{M}^{-1}$              | <b>0.01075</b>      | <b>0.47%</b>    | <b>-2.33%</b>   | <b>2.33%</b>    | <b>-5.12%</b>   | <b>3.26%</b>     | <b>-6.98%</b>    | <b>0.93%</b>     | <b>-1.40%</b>    | <b>3.26%</b>        | <b>-0.47%</b>       |
| $K_{Pi}$                | mM                              | 100                 | 0.00%           | 0.00%           | 0.00%           | 0.00%           | 0.00%            | 0.00%            | 0.00%            | 0.00%            | 0.00%               | 0.00%               |
| $K_T$                   | $\mu\text{M}^{-1}$              | 0.003               | 0.00%           | 0.00%           | 0.00%           | 0.00%           | 0.00%            | 0.00%            | 0.00%            | 0.00%            | 0.00%               | 0.00%               |
| $K_H$                   | —                               | <b>8.9136</b>       | <b>-1.48%</b>   | <b>0.30%</b>    | <b>-2.16%</b>   | <b>1.04%</b>    | <b>-2.55%</b>    | <b>1.83%</b>     | <b>-0.51%</b>    | <b>0.20%</b>     | <b>0.97%</b>        | <b>-0.47%</b>       |
| $K_{AH}$                | —                               | <b>63.145</b>       | <b>-1.48%</b>   | <b>0.33%</b>    | <b>-2.18%</b>   | <b>1.06%</b>    | <b>-2.57%</b>    | <b>1.86%</b>     | <b>-0.63%</b>    | <b>0.20%</b>     | <b>0.98%</b>        | <b>-0.41%</b>       |
| Forward Rate Constants  |                                 |                     |                 |                 |                 |                 |                  |                  |                  |                  |                     |                     |
| $k_A$                   | $\mu\text{M}^{-1}\text{s}^{-1}$ | <b>10.75</b>        | <b>0.47%</b>    | <b>-2.33%</b>   | <b>2.33%</b>    | <b>-5.12%</b>   | <b>3.26%</b>     | <b>-6.98%</b>    | <b>0.93%</b>     | <b>-1.40%</b>    | <b>3.26%</b>        | <b>-0.47%</b>       |
| $k_{Pi}$                | $\text{s}^{-1}$                 | <b>15.95</b>        | <b>-0.31%</b>   | <b>2.19%</b>    | <b>-2.19%</b>   | <b>5.33%</b>    | <b>-2.82%</b>    | <b>6.58%</b>     | <b>-0.31%</b>    | <b>0.94%</b>     | <b>-3.45%</b>       | <b>0.31%</b>        |
| $k_T$                   | $\mu\text{M}^{-1}\text{s}^{-1}$ | <b>10.048</b>       | <b>0.00%</b>    | <b>0.00%</b>    | <b>0.00%</b>    | <b>0.00%</b>    | <b>0.00%</b>     | <b>0.00%</b>     | <b>0.00%</b>     | <b>0.00%</b>     | <b>0.01%</b>        | <b>0.00%</b>        |
| $k_H$                   | $\text{s}^{-1}$                 | <b>12.479</b>       | <b>-1.48%</b>   | <b>0.32%</b>    | <b>-2.16%</b>   | <b>1.04%</b>    | <b>-2.55%</b>    | <b>1.83%</b>     | <b>-0.51%</b>    | <b>0.20%</b>     | <b>0.97%</b>        | <b>-0.47%</b>       |
| $k_{AH}$                | $\text{s}^{-1}$                 | <b>12.629</b>       | <b>-1.49%</b>   | <b>0.33%</b>    | <b>-2.18%</b>   | <b>1.06%</b>    | <b>-2.57%</b>    | <b>1.86%</b>     | <b>-0.63%</b>    | <b>0.20%</b>     | <b>0.98%</b>        | <b>-0.41%</b>       |
| Backward Rate Constants |                                 |                     |                 |                 |                 |                 |                  |                  |                  |                  |                     |                     |
| $k_{-A}$                | $\text{s}^{-1}$                 | 1000                | 0.00%           | 0.00%           | 0.00%           | 0.00%           | 0.00%            | 0.00%            | 0.00%            | 0.00%            | 0.00%               | 0.00%               |
| $k_{-Pi}$               | $\text{mM}^{-1}\text{s}^{-1}$   | <b>0.159</b>        | <b>-0.31%</b>   | <b>2.19%</b>    | <b>-2.19%</b>   | <b>5.33%</b>    | <b>-2.82%</b>    | <b>6.58%</b>     | <b>-0.31%</b>    | <b>0.94%</b>     | <b>-3.45%</b>       | <b>0.31%</b>        |
| $k_{-T}$                | $\text{s}^{-1}$                 | <b>3349.37</b>      | <b>0.00%</b>    | <b>0.00%</b>    | <b>0.00%</b>    | <b>0.00%</b>    | <b>0.00%</b>     | <b>0.00%</b>     | <b>0.00%</b>     | <b>0.00%</b>     | <b>0.01%</b>        | <b>0.00%</b>        |
| $k_{-H}$                | $\text{s}^{-1}$                 | 1.4                 | 0.00%           | 0.00%           | 0.00%           | 0.00%           | 0.00%            | 0.00%            | 0.00%            | 0.00%            | 0.00%               | 0.00%               |
| $k_{-AH}$               | $\text{s}^{-1}$                 | 0.2                 | 0.00%           | 0.00%           | 0.00%           | 0.00%           | 0.00%            | 0.00%            | 0.00%            | 0.00%            | 0.00%               | 0.00%               |

Numbers in bold (black) were obtained from fits to the ATPase data shown in Fig 2A & 3A. The rest of the values were assigned as described in the methods section. Bold grey numbers are calculated from fitted values in bold black.

**TABLE S5: The effect of change of  $k_H$  by  $\pm 20\%$  on estimated parameters including  $k_{Pi}$**

|                         | Units                           | Estimated constants   | Fixed $k_{-H}$        |                       | Fixed $k_{-H}$ |                |
|-------------------------|---------------------------------|-----------------------|-----------------------|-----------------------|----------------|----------------|
|                         |                                 |                       | $k_H +20\%$           | $k_H -20\%$           | $k_H +20\%$    | $k_H -20\%$    |
| $K_A$                   | $\mu\text{M}^{-1}$              | <b>0.01075</b>        | <b>0.00758</b>        | <b>0.0128</b>         | <b>-29.51%</b> | <b>19.23%</b>  |
| $K_{Pi}$                | mM                              | 100                   | 100                   | 100                   | 0.00%          | 0.00%          |
| $K_T$                   | $\mu\text{M}^{-1}$              | 0.003                 | 0.003                 | 0.003                 | 0.00%          | 0.00%          |
| $K_H$                   | –                               | <b>8.9136</b>         | <b>7.1257</b>         | <b>10.696</b>         | <b>20.00%</b>  | <b>-20.00%</b> |
| $K_{AH}$                | –                               | <b>63.145</b>         | <b>50.4133</b>        | <b>75.888</b>         | <b>-20.16%</b> | <b>20.18%</b>  |
| Forward Rate Constants  |                                 |                       |                       |                       |                |                |
| $k_A$                   | $\mu\text{M}^{-1}\text{s}^{-1}$ | <b>10.75</b>          | <b>7.578</b>          | <b>12.82</b>          | <b>-29.51%</b> | <b>19.23%</b>  |
| $k_{Pi}$                | $\text{s}^{-1}$                 | <b>15.950</b>         | <b>23.290</b>         | <b>13.129</b>         | <b>46.02%</b>  | <b>-17.77%</b> |
| $k_T$                   | $\mu\text{M}^{-1}\text{s}^{-1}$ | <b>10.048</b>         | <b>10.042</b>         | <b>10.047</b>         | <b>0.00%</b>   | <b>0.00%</b>   |
| $k_H$                   | $\text{s}^{-1}$                 | 12.479                | 9.976                 | 14.975                | -20.00%        | 20.00%         |
| $k_{AH}$                | $\text{s}^{-1}$                 | <b>12.629</b>         | <b>10.083</b>         | <b>15.178</b>         | <b>-20.16%</b> | <b>20.18%</b>  |
| Backward Rate Constants |                                 |                       |                       |                       |                |                |
| $k_{-A}$                | $\text{s}^{-1}$                 | 1000                  | 1000                  | 1000                  | 0.00%          | 0.00%          |
| $k_{-Pi}$               | $\text{mM}^{-1}\text{s}^{-1}$   | <b>0.159</b>          | <b>0.233</b>          | <b>0.131</b>          | <b>46.48%</b>  | <b>-17.51%</b> |
| $k_{-T}$                | $\text{s}^{-1}$                 | <b>3349.37</b>        | <b>3349.45</b>        | <b>3349.17</b>        | <b>0.00%</b>   | <b>0.00%</b>   |
| $k_{-H}$                | $\text{s}^{-1}$                 | 1.4                   | 1.4                   | 1.4                   | 0.00%          | 0.00%          |
| $k_{-AH}$               | $\text{s}^{-1}$                 | 0.2                   | 0.2                   | 0.2                   | 0.00%          | 0.00%          |
| Error                   | $\text{s}^{-1}$                 | $1.43 \times 10^{-6}$ | $7.60 \times 10^{-7}$ | $1.76 \times 10^{-6}$ |                |                |

Numbers in bold (black) were obtained from fits to the ATPase data shown in Fig 2A & 3A. The rest of the values were assigned as described in the methods section. Bold gray numbers are calculated from fitted values in bold black.



**Table S6 Change of state occupancies of intermediates in the crossbridge cycle for HC WT  $\beta$  - S1 as a function of +/- 20%  $k_H$  at actin concentration  $K_m = 39.55 \mu\text{M}$ .**

|                          | A-MDPi | AMD    | AM-D   | AM     | AMT    | A-MT   | MT     | MDPi   | ATPase<br>( $\text{s}^{-1}$ ) | Detach | Weak<br>Att | Strong<br>Att | Duty<br>ratio | Velocity<br>( $\mu\text{m/s}$ ) |
|--------------------------|--------|--------|--------|--------|--------|--------|--------|--------|-------------------------------|--------|-------------|---------------|---------------|---------------------------------|
| [A] = $K_m$              | 0.1865 | 0.0682 | 0.0029 | 0.0002 | 0.0020 | 0.0137 | 0.2777 | 0.4484 | 2.9750                        | 0.7262 | 0.2002      | 0.0734        | 0.0734        | 0.2026                          |
| [A] = $3K_m$ +20% $k_H$  | 0.2265 | 0.0681 | 0.0029 | 0.0002 | 0.0020 | 0.0119 | 0.2320 | 0.4561 | 2.9717                        | 0.6881 | 0.2385      | 0.0733        | 0.0733        | 0.2026                          |
| [A] = $20K_m$ -20% $k_H$ | 0.1275 | 0.0681 | 0.0029 | 0.0002 | 0.0020 | 0.0164 | 0.3452 | 0.4374 | 2.9714                        | 0.7826 | 0.1439      | 0.0733        | 0.0733        | 0.2025                          |
